# Supplementary material for: Dysregulated MicroRNAs as Biomarkers or Therapeutic Targets in Cisplatin-Induced Nephrotoxicity: A Systematic Review
Source: MDPI journal article supplement (doi:10.3390/ijms222312765), 2021-11-25
Supplement: s1 [file s1]

**Supplementary Table S1.** List of excluded studies.

| Reason for exclusion | Authors, year     | Title                                                                                                                                        | Reference |
|----------------------|-------------------|----------------------------------------------------------------------------------------------------------------------------------------------|-----------|
| Comment              | Seki, 2011        | A commentary on microRNA-141 confers resistance to cisplatin-induced apoptosis by targeting YAP1 in human esophageal squamous cell carcinoma | [1]       |
|                      | Akand et al./2020 | Time to change the management of upper urinary tract urothelial carcinoma                                                                    | [2]       |
| Conference abstract  | Joo et al./2010   | miR-125b transcriptionally induced by Nrf2 inhibits AhR repressor for AhR activation                                                         | [3]       |
| Correspondence       | Wu et al./2017    | Peri-operative chemotherapy with or without bevacizumab in operable oesophagogastric adenocarcinoma                                          | [4]       |

|                                                                     |                             |                                                                                                                          |     |
|---------------------------------------------------------------------|-----------------------------|--------------------------------------------------------------------------------------------------------------------------|-----|
| Review                                                              | Nayeri and Babaknejad, 2016 | Evaluation of novel biomarkers in nephrotoxicity                                                                         | [5] |
| Kidney injury not developed by cisplatin                            | Pavkovic et al./2015        | Glomerulonephritis-induced changes in urinary and kidney microRNA profiles in rats                                       | [6] |
| Without quantification of miRNA or presentation of these data       | Pellegrini et al./2014      | MicroRNA-155 deficient mice experience heightened kidney toxicity when dosed with cisplatin                              | [7] |
| Assessment of exposure to cisplatin concomitantly with another drug | Joo et al./2013             | miR-125b transcriptionally increased by Nrf2 inhibits AhR repressor, which protects kidney from cisplatin-induced injury | [8] |
| Without nephrotoxicity assessment                                   | Pellegrini et al./2016      | Application of small RNA sequencing to identify microRNAs in acute kidney injury and fibrosis                            | [9] |

---

#### REFERENCES:

1. Seki N (2011) A commentary on microRNA-141 confers resistance to cisplatin-induced apoptosis by targeting YAP1 in human esophageal squamous

cell carcinoma. *J Hum Genet* 56:339–340. <https://doi.org/10.1038/jhg.2011.26>

2. Akand M, Muilwijk T, Aa F Van Der, Joniau S (2020) Time to change the management of upper urinary tract urothelial carcinoma. *Cent Eur J Urol* 73:381–382. <https://doi.org/10.5173/cej.2020.0181>
3. Joo MS, Lee CG, Koo JH, Kim SG (2010) miR-125b transcriptionally induced by Nrf2 inhibits AhR repressor for AhR activation. *J Pharm Pharmacol / Vol 56, Issue 3 Hum* 0:3–5
4. Wu J, Qiu K, Zhu J (2017) Peri-operative chemotherapy with or without bevacizumab in operable oesophagogastric adenocarcinoma. *Lancet Oncol* 18:e241–e242. [https://doi.org/10.1016/S1470-2045\(17\)30262-0](https://doi.org/10.1016/S1470-2045(17)30262-0)
5. Nayeri H, Babaknejad N (2016) Evaluation of novel biomarkers in nephrotoxicity. *Biomark Med* 10:1209–1213. <https://doi.org/10.2217/bmm-2016-0235>
6. Pavkovic M, Riefke B, Frisk AL, et al (2015) Glomerulonephritis-induced changes in urinary and kidney microRNA profiles in rats. *Toxicol Sci* 145:348–359. <https://doi.org/10.1093/toxsci/kfv053>
7. Pellegrini KL, Han T, Bijol V, et al (2014) MicroRNA-155 deficient mice experience heightened kidney toxicity when dosed with cisplatin. *Toxicol Sci* 141:484–492. <https://doi.org/10.1093/toxsci/kfu143>
8. Joo MS, Lee CG, Koo JH, Kim SG (2013) miR-125b transcriptionally increased by Nrf2 inhibits AhR repressor, which protects kidney from cisplatin-induced injury. *Cell Death Dis* 4:e899-12. <https://doi.org/10.1038/cddis.2013.427>
9. Pellegrini KL, Gerlach C V., Craciun FL, et al (2016) Application of small RNA sequencing to identify microRNAs in acute kidney injury and fibrosis. *Toxicol Appl Pharmacol* 312:42–52. <https://doi.org/10.1016/j.taap.2015.12.002>
