# Supplementary material for: Dysregulated MicroRNAs as Biomarkers or Therapeutic Targets in Cisplatin-Induced Nephrotoxicity: A Systematic Review
Source: MDPI journal article supplement (doi:10.3390/ijms222312765), 2021-11-25
Supplement: s1 [file s1]

Supplementary Figures S1 and S2

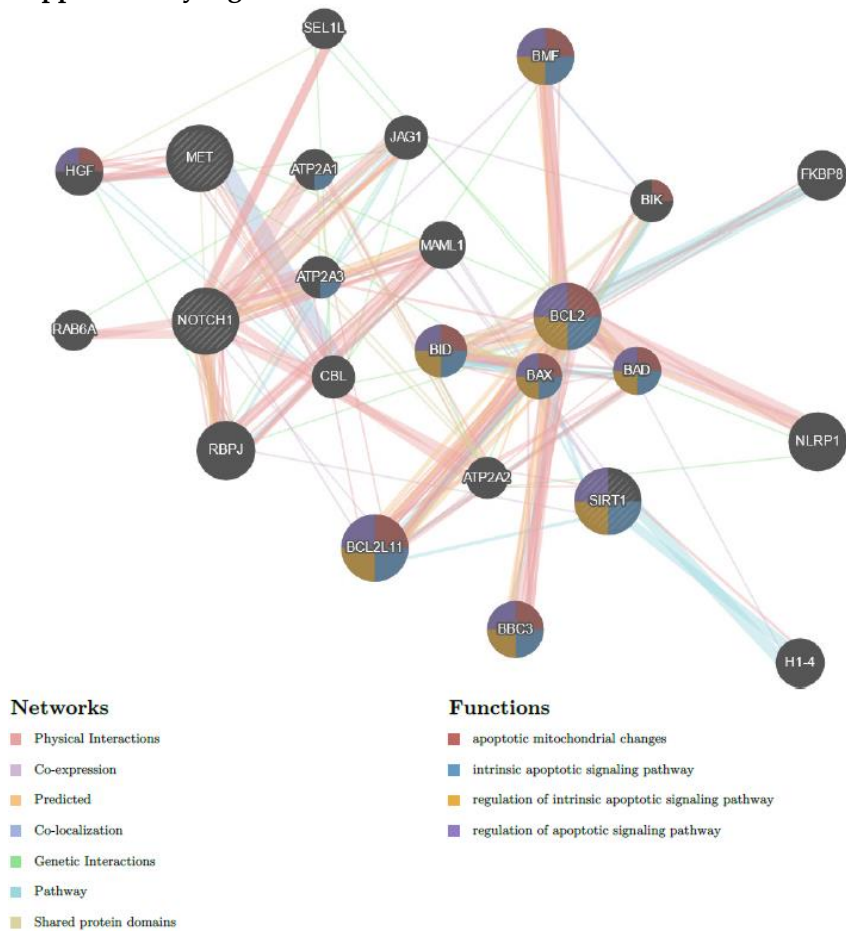

**Figure S1.** Pathways related to the main miR-34a targets (*BCL2*, *MET*, *NOTCH1*, and *SIRT1*), selected from *in silico* analysis (the figure was generated using the GeneMANIA website tool, <https://genemania.org/>).

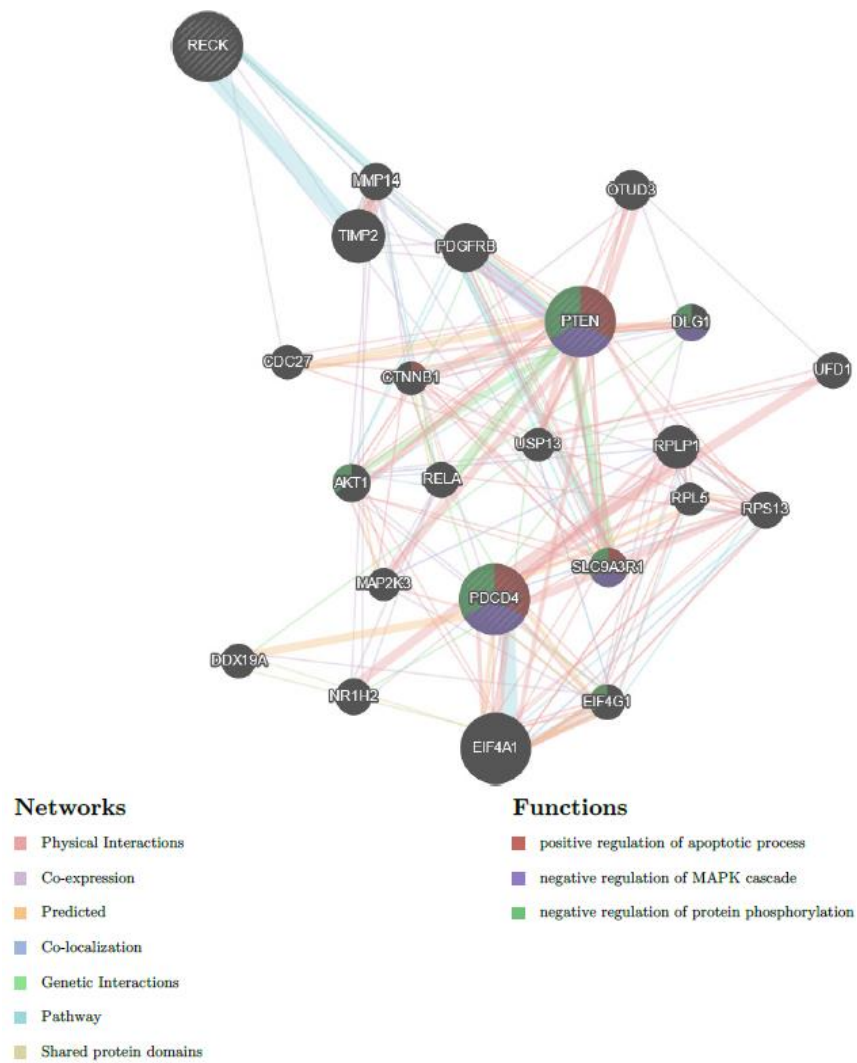

**Figure S2.** Pathways related to the main miR-21 targets (*PDCD4*, *PTEN*, and *RECK*), selected from *in silico* analysis (the figure was generated using the GeneMANIA website tool, <https://genemania.org/>).
