# Supplementary material for: Dysregulated MicroRNAs as Biomarkers or Therapeutic Targets in Cisplatin-Induced Nephrotoxicity: A Systematic Review
Source: Int J Mol Sci. 2021 Nov 25;22(23):12765. doi: 10.3390/ijms222312765 (PMC8657822; doi:10.3390/ijms222312765)
Supplement: Supplementary file 1 [file ijms-22-12765-s001.zip]

Archive with 4 entries (4 files):
- 1 - Supplementary Table S1. List of excluded studies.pdf
- 2 - Supplementary table s2.pdf
- 3 - Supplementary file 1. Search Strategy.pdf
- 4 - Supplementary Figures S1 and S2.pdf
